# Supplementary material for: Two novel low molecular weight gelator-driven supramolecular metallogels efficient in antimicrobial activity applications
Source: Royal Society of Chemistry journal article supplement (doi:10.1039/d3ra05019j), 2023-01-01
Supplement: d3ra05019j1.pdf [file d3ra05019j1.pdf]

## Electronic Supplementary Information†

### Low molecular weight gelator driven two novel supramolecular metallogels efficient in antimicrobial activity application†

Subhendu Dhibar,<sup>\*a,‡</sup> Suchetana Pal,<sup>b,‡</sup> Kripasindhu Karmakar,<sup>a</sup> Sk Abdul Hafiz,<sup>c</sup> Subham Bhattacharjee,<sup>c</sup> Arpita Roy,<sup>d</sup> SK. Meheub Rahaman,<sup>a</sup> Soumya Jyoti Ray,<sup>d</sup> Somasri Dam,<sup>\*b</sup> Bidyut Saha,<sup>\*a</sup>

<sup>a</sup>Colloid Chemistry Laboratory, Department of Chemistry, The University of Burdwan, Golapbag, Burdwan-713104, West Bengal, India \*E-mail: sdhibar@scholar.buruniv.ac.in, Tel: +91 7001575909 (S. Dhibar); \*E-mail: bsaha@chem.buruniv.ac.in, Tel: +91 9476341691 (B. Saha).

<sup>b</sup>Department of Microbiology, The University of Burdwan, Burdwan-713104, West Bengal, India, \*E-mail: sdam@microbio.buruniv.ac.in (S. Dam).

<sup>c</sup>Department of Chemistry, Kazi Nazrul University, Asansol-713303, West Bengal, India.

<sup>d</sup>Department of Physics, Indian Institute of Technology Patna, Bihar-801106, India.

‡SD and SP should be treated as joint first authors.

**Field Emission Scanning Electron Microscopic Study of Cd-CA metallogel:**

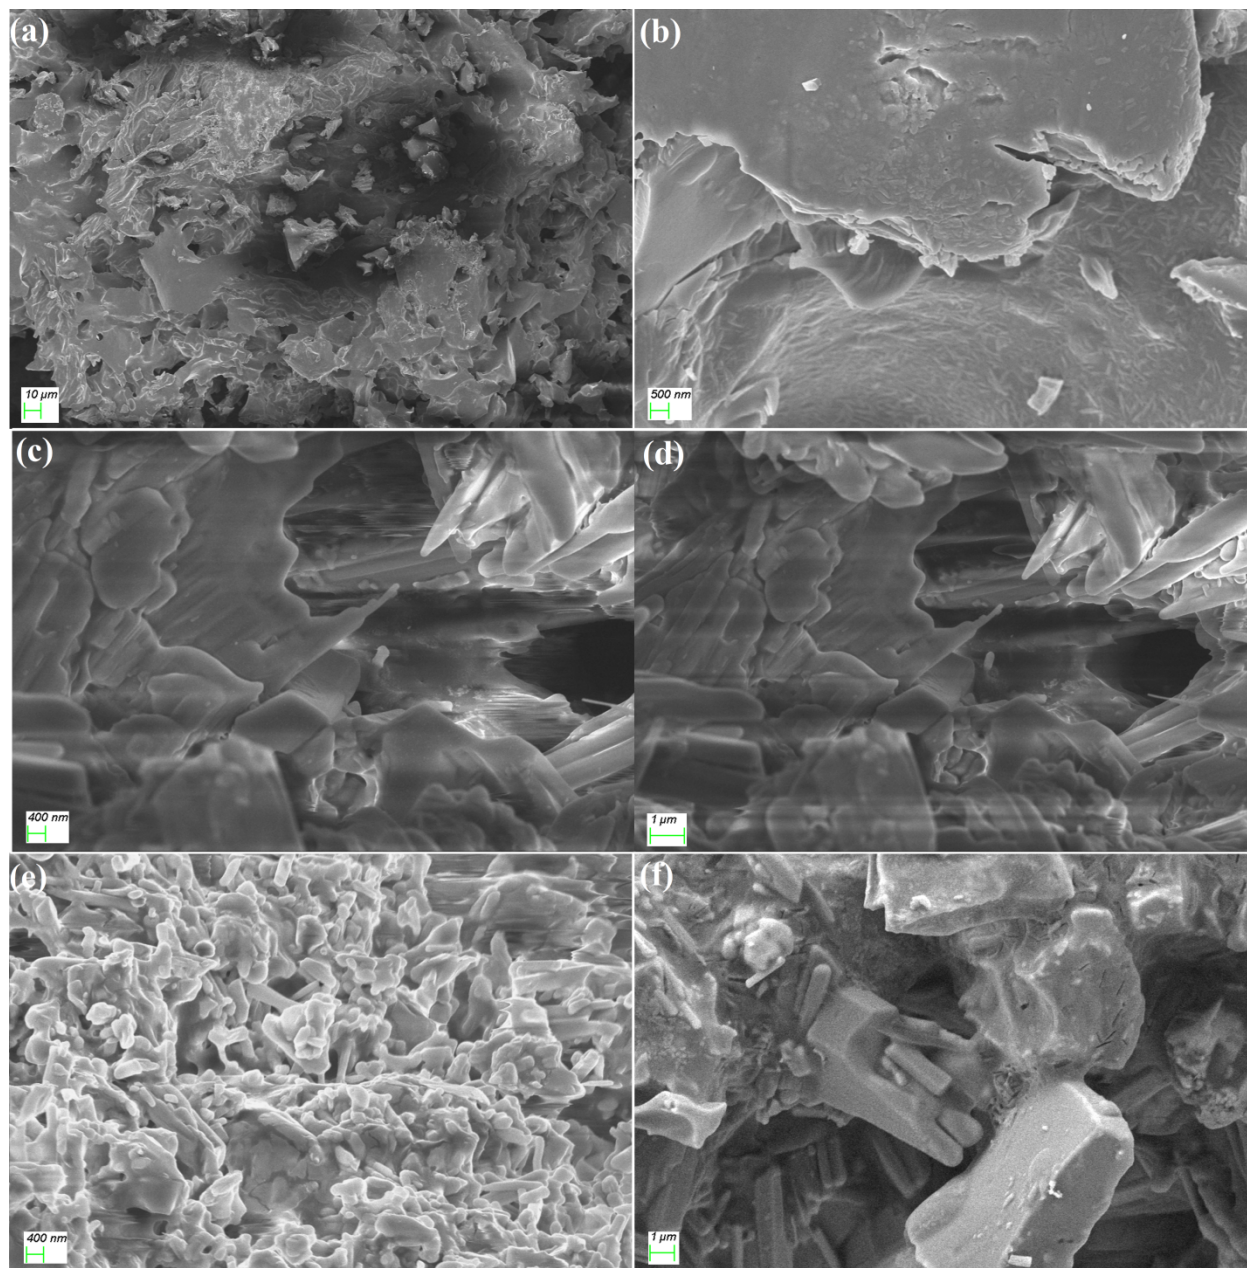

**Fig. S1.** (a-f) FESEM images of Cd-CA metallogel.

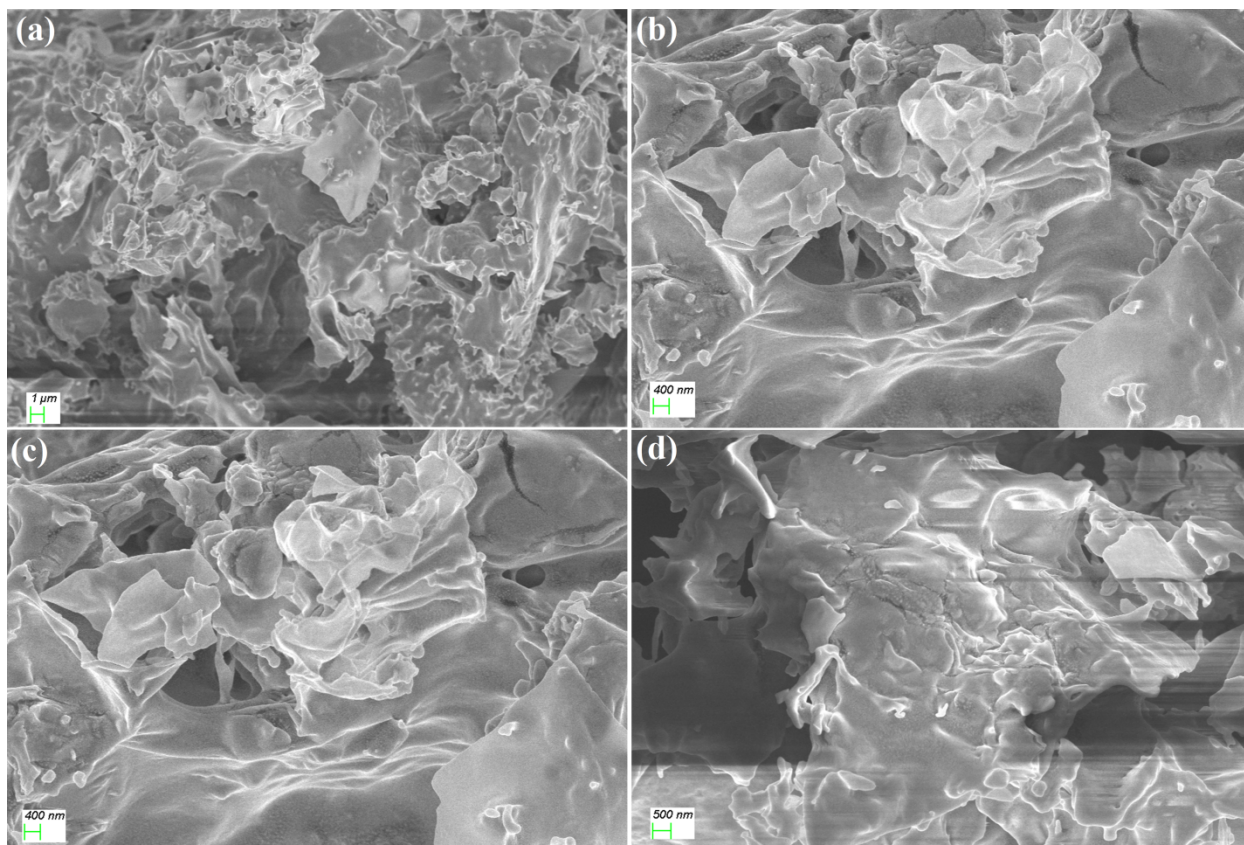

**Fig. S2.** (a-d) FESEM images of Hg-CA metallogel.



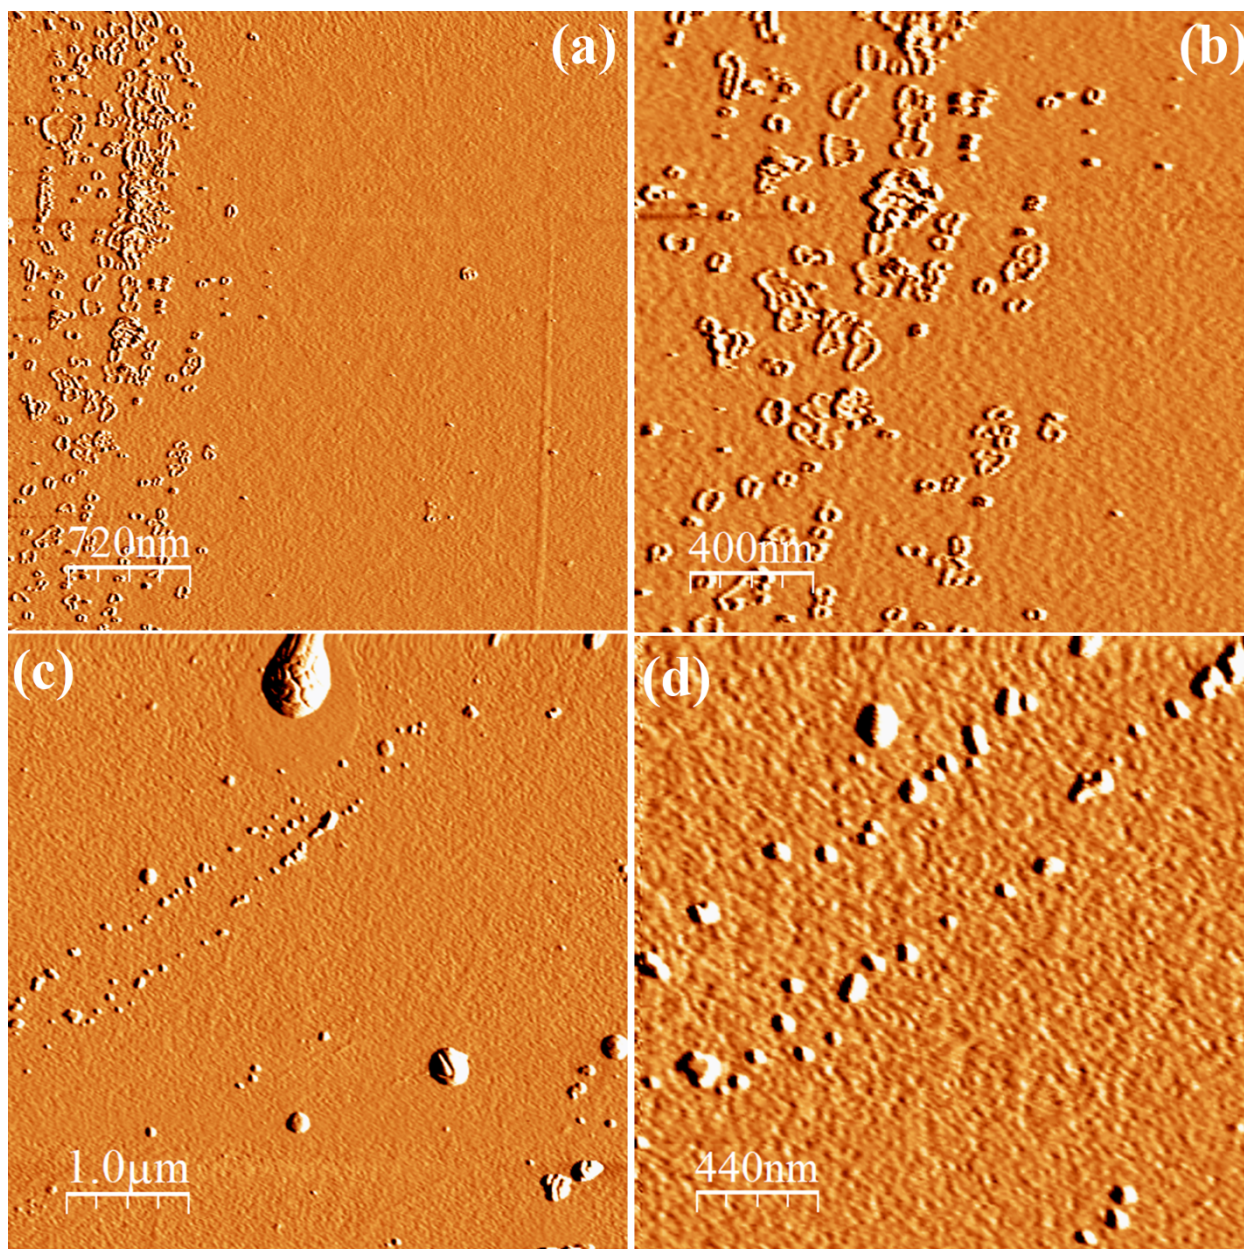

**Fig. S3.** (a-d) AFM images of Cd-CA metallogel.



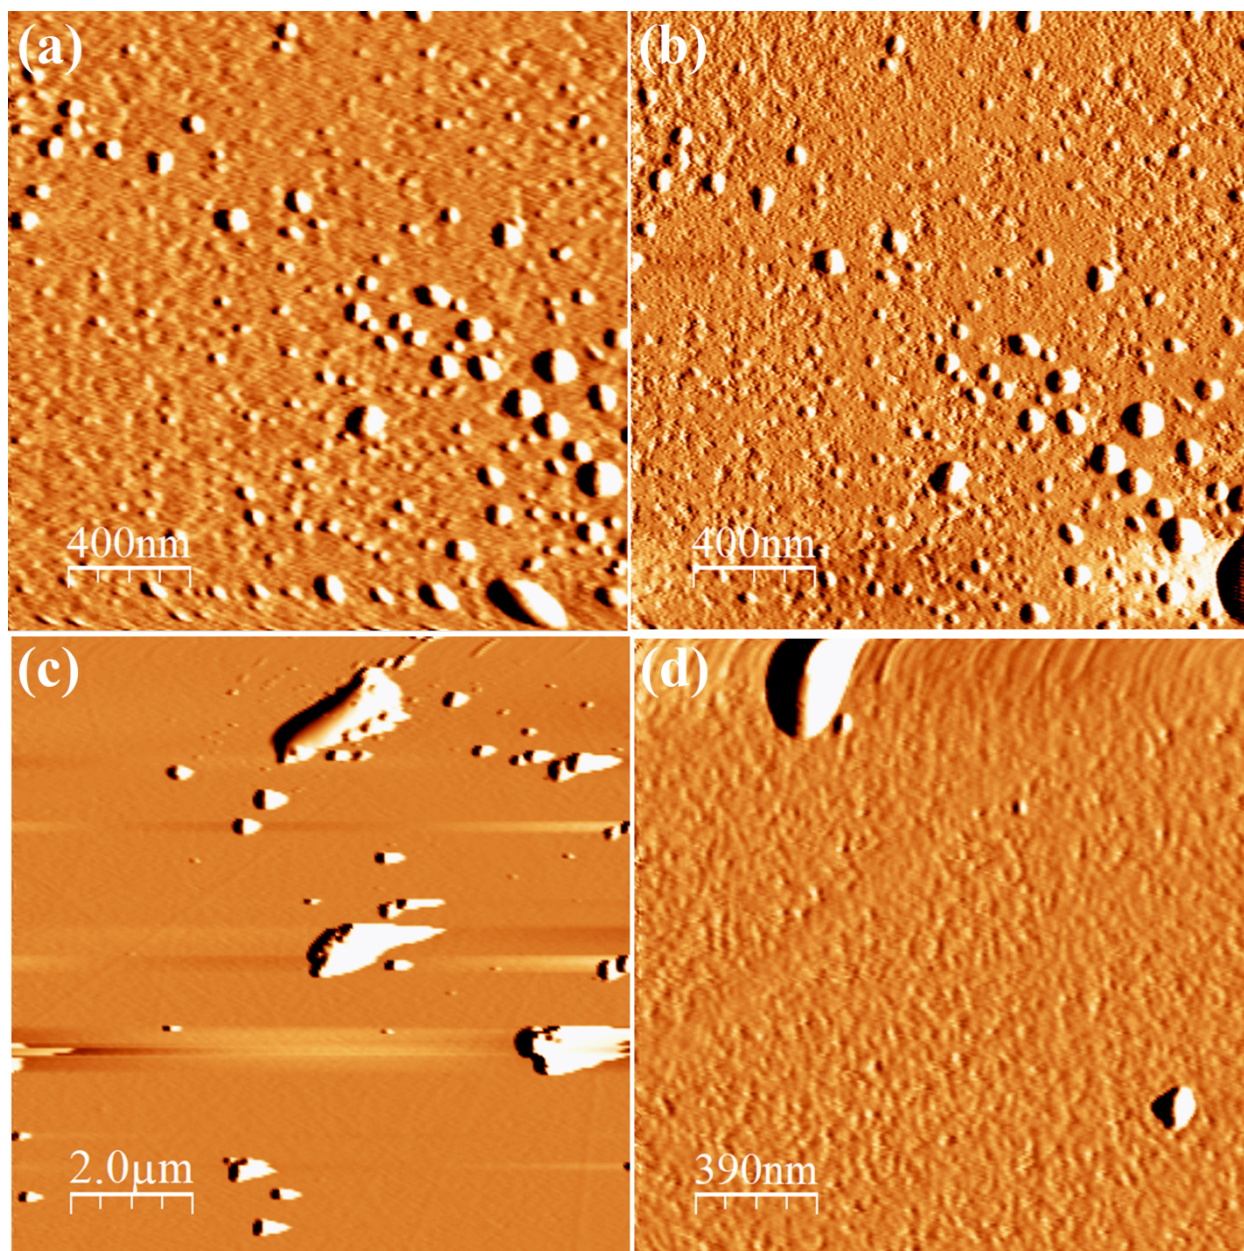

**Fig. S4.** (a-d) AFM images of Hg-CA metallogel.
